# Retraction: Endoplasmic reticulum stress promotes autophagy and apoptosis and reverses chemoresistance in human ovarian cancer cells

Jin-Long Hu<sup>1</sup>, Xin-Long Hu<sup>2</sup>, Ai-Ye Guo<sup>3</sup>, Chao-Jie Wang<sup>1</sup>, Yi-Yang Wen<sup>1</sup> and Shun-Dong Cang<sup>1</sup>

<sup>1</sup>Department of Oncology, Henan Provincial People's Hospital, Zhengzhou 450000, P. R. China

<sup>2</sup>Department of Medical Imaging Technology, Henan University of Chinese Medicine, Zhengzhou 450000, P. R. China

<sup>3</sup>Laboratory of Clinical Research, Henan Provincial People's Hospital, Zhengzhou 450000, P. R. China

**Published:** December 31, 2025

**Copyright:** © 2025 Hu et al. This is an open access article distributed under the terms of the [Creative Commons Attribution License](#) (CC BY 4.0), which permits unrestricted use, distribution, and reproduction in any medium, provided the original author and source are credited.

**This article has been retracted:** Oncotarget has completed its investigation of the article, which uncovered multiple instances of image duplication and overlap. Specifically, Figure 2B contains western blot bands also found in Figure 9A of [1], Figure 5A of [2], and Figure 7C of [3]. The b-actin blots in Figures 5B and 6A appeared as different blots in papers [4, 5], respectively. Multiple internal and external duplications of plate images from the colony formation assay were found in Figures 3D, 6D and 8D. The Figure 8D images were also found in Figure 2C of [6], in Figure 4B of [7], in Figure 5C of [8], and in Figure 7C of [9]. In addition, overlaps were found in the MDC staining fluorescent images across Figures 3E and 6E, and 6E and 8E. The authors have failed to respond to repeated requests for documentation to address these concerns. In light of these facts, the Editorial decision has been made to retract this paper.

Original article: Oncotarget. 2017; 8:49380–49394. <https://doi.org/10.18632/oncotarget.17673>

## REFERENCES

1. Zhang ZC, Liu JX, Shao ZW, Pu FF, Wang BC, Wu Q, Zhang YK, Zeng XL, Guo XD, Yang SH, He TC. In vitro effect of microRNA-107 targeting Dkk-1 by regulation of Wnt/ $\beta$ -catenin signaling pathway in osteosarcoma. *Medicine (Baltimore)*. 2017; 96:e7245. <https://doi.org/10.1097/MD.00000000000007245>. [PubMed]
2. Lin X, Zheng L, Song H, Xiao J, Pan B, Chen H, Jin X, Yu H. Effects of microRNA-183 on epithelial-mesenchymal transition, proliferation, migration, invasion and apoptosis in human pancreatic cancer SW1900 cells by targeting MTA1. *Exp Mol Pathol*. 2017; 102:522–32. <https://doi.org/10.1016/j.yexmp.2017.05.009>. [PubMed]
3. Long ZW, Wu JH, Cai-Hong, Wang YN, Zhou Y. MiR-374b Promotes Proliferation and Inhibits Apoptosis of Human GIST Cells by Inhibiting PTEN through Activation of the PI3K/Akt Pathway. *Mol Cells*. 2018; 41:532–44. <https://doi.org/10.14348/molcells.2018.2211>. [PubMed]
4. Wang W, Li X, Wang F, Sun XY. Effect of TET1 regulating MGMT on chemotherapy resistance of oral squamous cell carcinoma stem cells. *J Cell Biochem*. 2018; 119:723–35. <https://doi.org/10.1002/jcb.26236>. [PubMed]
5. Huang HY, Chang HF, Tsai MJ, Chen JS, Wang MJ. 6-Mercaptopurine attenuates tumor necrosis factor- $\alpha$  production in microglia through Nur77-mediated transrepression and PI3K/Akt/mTOR signaling-mediated translational regulation. *J Neuroinflammation*. 2016; 13:78. <https://doi.org/10.1186/s12974-016-0543-5>. [PubMed]
6. Chen XE, Chen P, Chen SS, Ma T, Shi G, Zhou Y, Li J, Sheng L. miR-106b-5p promotes cell cycle progression of malignant melanoma by targeting PTEN. *Oncol Rep*. 2018; 39:331–37. <https://doi.org/10.3892/or.2017.6099>. [PubMed]. Retraction in: *Oncol Rep*. 2024; 51:10. <https://doi.org/10.3892/or.2023.8669>. [PubMed]
7. Ba S, Xuan Y, Long ZW, Chen HY, Zheng SS. MicroRNA-27a Promotes the Proliferation and Invasiveness of Colon Cancer Cells by Targeting SFRP1 through the Wnt/ $\beta$ -Catenin Signaling Pathway. *Cell Physiol Biochem*. 2017; 42:1920–33. <https://doi.org/10.1159/000479610>. [PubMed]. Retraction in: *Cell Physiol Biochem*. 2021; 55:140. <https://doi.org/10.33594/000000349>. [PubMed]

8. Liu RT, Cao JL, Yan CQ, Wang Y, An CJ, Lv HT. Effects of LncRNA-HOST2 on cell proliferation, migration, invasion and apoptosis of human hepatocellular carcinoma cell line SMMC-7721. *Biosci Rep.* 2017; 37:BSR20160532. <https://doi.org/10.1042/BSR20160532>. [PubMed]. Retraction in: *Biosci Rep.* 2021; 41:BSR-2016-0532\_RET. [https://doi.org/10.1042/BSR-2016-0532\\_RET](https://doi.org/10.1042/BSR-2016-0532_RET). [PubMed]
9. Wang L, Liu LF, Zhou L, Liao F, Wang J. Effects of ebv-miR-BART7 on tumorigenicity, metastasis, and TRAIL sensitivity of non-small cell lung cancer. *J Cell Biochem.* 2019; 120:10057–68. <https://doi.org/10.1002/jcb.28289>. [PubMed]. Retraction in: *J Cell Biochem.* 2021 (Suppl 1); 122:S125. <https://doi.org/10.1002/jcb.30105>. [PubMed]
